# Supplementary material
Source: PubMed Central journal article supplement (PMC3955214)
Supplement: NIHMS561367-supplement-01.pdf [file NIHMS561367-supplement-01.pdf]

Online Supplement.

Supplemental Table 1. Sensitivity analyses examining the importance of the proportion of deaths from right heart failure in interpreting the relationship between DPG and overall post-transplant mortality. In these analyses the sensitivity and specificity of DPG to identify patients with post-transplant right heart failure was arbitrarily selected and the ability of DPG to identify non-right heart failure related mortality was assumed to be no greater than chance. The proportion of right heart failure as a component of total mortality was considered over a broad range and 10% is presented here.

|                                                                                      | Mortality (10% Overall Mortality) |       |       |         |
|--------------------------------------------------------------------------------------|-----------------------------------|-------|-------|---------|
|                                                                                      | n                                 | DPG + | DPG - | p-value |
| DPG is a perfect test for right heart failure<br>(sensitivity and specificity = 1.0) |                                   |       |       |         |
| All deaths from right heart failure                                                  | 6000                              | 10%   | 0%    | <0.0001 |
| 10% of deaths from right heart failure                                               | 6000                              | 5.5%  | 4.5%  | 0.0001  |
| DPG is a good test for right heart failure<br>(sensitivity and specificity = 0.83)   |                                   |       |       |         |
| All deaths from right heart failure                                                  | 6000                              | 8.3%  | 1.7%  | <0.0001 |
| 10% of deaths from right heart failure                                               | 6000                              | 5.3%  | 4.7%  | 0.02    |

DPG = Diastolic Pulmonary Gradient
